# Supplementary material for: Deconvolution of Earth radiation budget data
Source: Royal Society of Chemistry journal article supplement (doi:10.1039/d2cc06422g), 1977-01-01
Supplement: d2cc06422g1.pdf [file d2cc06422g1.pdf]

# **A “dual-key-and-lock” ratiometric fluorescent probe with biocompatibility and selectivity for imaging vicinal dithiol proteins**

Guang-Yue Zou,<sup>‡</sup> Yun Wen,<sup>‡</sup> Fan Bi, Shuai Chen,\* Yong-Liang Yu\* and Jian-Hua Wang

*Research Center for Analytical Sciences, Department of Chemistry, College of Sciences, Northeastern University, Box 332, Shenyang 110819, China*

<sup>‡</sup> *These authors contributed equally to this work.*

## **Corresponding authors.**

\*E-mail: [chenshuai@mail.neu.edu.cn](mailto:chenshuai@mail.neu.edu.cn) (S. Chen); [yuyi@mail.neu.edu.cn](mailto:yuyi@mail.neu.edu.cn) (Y.-L. Yu)

Tel: +86 24 83688944; Fax: +86 24 83676698

## **Electronic Supplementary Information**

## **Materials**

3,5-diaminobenzoic acid, acetonitrile and zinc powder were purchased from Aladdin Chemistry Co., Ltd. (Shanghai, China, <https://www.aladdin-e.com/>). Maleic anhydride, ethanol, methanol,  $\text{CHCl}_3$ , anhydride, THF, DIPEA and sodium acetate were purchased from Sinopharm Chemical Reagent Co., Ltd. (Shanghai, China, <https://www.sinoreagent.com/>).  $\text{TiCl}_4$ , HATU and BSA were purchased from Macklin Reagent Co., Ltd. (Shanghai, China, <http://www.macklin.cn/>). Fetal bovine serum (FBS) was supplied by Hyclone. DMEM, RPMI 1640 medium and 3-(4,5-dimethylthiazol-2-yl)-2,5-diphenyltetrazolium bromide (MTT) were from Dalian Meilun Biotechnology (Dalian, China, <http://www.meilune.com/>). HepG2 cells were obtained from National Collection of Authenticated Cell Cultures (Shanghai, China, <https://www.cellbank.org.cn/>). All of chemicals were used without further purification. Deionized (DI) water of 18 M $\Omega$  cm was used to prepare all aqueous solutions.

## **Apparatus and characterization**

NMR experiments were performed on a Bruker Avance NEO spectrometer. Photoluminescence spectra were obtained using a Shimadzu RF-6000 fluorescence spectrophotometer. MTT assay was conducted by using a BioTek Synergy H1 ELISA plate reader at 570 nm. Confocal laser scanning microscope (CLSM) images were obtained on an Olympus FV-1200 confocal laser scanning microscope.

## **Cell culture and MTT assay**

HepG2 cells were cultured in Dulbecco's modified Eagle's medium (DMEM). Medium

was supplemented with 10% fetal bovine serum and appropriate amounts of antibiotics (penicillin and streptomycin).

The viability of cells treated with TMR-TPE and PAO-EDT was determined by an MTT assay with 3-(4,5-dimethylthiazole-2-yl) 2,5-phenyltetrazolium bromide. HepG2 cells were cultured in a 96-well plate at 37°C under 5% CO<sub>2</sub> for 12 h. Then, cells were treated with different concentrations of TMR-TPE and PAO-EDT, respectively. After 24 h incubation, 20 µL of 5 mg mL<sup>-1</sup> MTT solution was added into each well for 4 h. Then, the medium was aspirated out, and 150 µL of DMSO was added to dissolve the formazan. Absorbance was measured at 570 nm. Cell viability (%) was determined by the following equation: Viability = (mean Abs. of treated wells/mean Abs. of control wells) × 100%.

### **Intracellular imaging of VDPs**

HepG2 cells were seeded in confocal dishes and incubated at 37 °C under 5% CO<sub>2</sub> for 12 h, and then incubated with TMR-TPE (25 µM) for 120 min. For negative control experiment, the cells were pretreated with MBA (30 µM) or PAO (30 µM) for 30 min and then incubated with TMR-TPE (25 µM) for 120 min. Fluorescent images of cells were obtained by using FV-1200 confocal laser scanning microscope. (Green channel:  $\lambda_{\text{ex}} = 405 \text{ nm}$ ,  $\lambda_{\text{em}} = 460\text{-}500 \text{ nm}$ ; red channel:  $\lambda_{\text{ex}} = 559 \text{ nm}$ ,  $\lambda_{\text{em}} = 575\text{-}630 \text{ nm}$ .).

### **Evaluation of the effect of oxidative stress on intracellular VDPs**

HepG2 cells were seeded in in confocal dishes and incubated at 37°C under 5% CO<sub>2</sub> for 12 h. Next, the cells were pretreated with H<sub>2</sub>O<sub>2</sub> (100 µM) for 30 min and then

incubated with TMR-TPE (25  $\mu$ M) for 120 min. Fluorescent images of cells were obtained by using FV-1200 confocal laser scanning microscope. (Green channel:  $\lambda_{\text{ex}}$  = 405 nm,  $\lambda_{\text{em}}$  = 460-500 nm; red channel:  $\lambda_{\text{ex}}$  = 559 nm,  $\lambda_{\text{em}}$  = 575-630 nm.).

### **Imaging of intracellular VDPs in DILI model**

HepG2 cells were seeded in confocal dishes and incubated at 37°C under 5% CO<sub>2</sub> for 12 h. Next, the cells were pretreated with APAP (200  $\mu$ M or 1 mM) for 12 h and then incubated with TMR-TPE (25  $\mu$ M) for 120 min. For evaluating the effect of the therapeutic drugs, cells were pretreated with GSH (500  $\mu$ M), NAC (500  $\mu$ M), and Glu (500  $\mu$ M) for 1 h before co-incubation with APAP (1 mM) for 12 h. Fluorescent images of cells were obtained by using FV-1200 confocal laser scanning microscope. (Green channel:  $\lambda_{\text{ex}}$  = 405 nm,  $\lambda_{\text{em}}$  = 460-500 nm; red channel:  $\lambda_{\text{ex}}$  = 559 nm,  $\lambda_{\text{em}}$  = 575-630 nm.).

### **Synthesis of compound 1**

3,5-diaminobenzoic acid (1000 mg; 6.55 mmol) and maleic anhydride (1924 mg; 19.65 mmol) was dissolved in CHCl<sub>3</sub> (60 mL) and heated to reflux for 20 h. The resulting precipitate was filtered, and acetic anhydride (50 mL) and sodium acetate (175.6 mg; 2.14 mmol) were added. The mixture was heated for another 1.5 h at 100°C. Cold water (150 mL) was added to the resulting clear solution, and the mixture was vigorously stirred for 2 h. The precipitate was filtered and washed with water (200 mL) and ethanol (50 mL) to afford compound 1. <sup>1</sup>H NMR (DMSO-*d*<sub>6</sub>): 7.98 (d, 2H), 7.65 (t, 1H), 7.23 (s, 4H). <sup>13</sup>C NMR (DMSO-*d*<sub>6</sub>): 170.04, 166.39, 135.30, 132.83, 132.48, 129.02,

126.81.

## Synthesis of compound 2

TiCl<sub>4</sub> (6.59 ml, 50 mmol) was added to an anhydrous THF (60 mL) solution of zinc powder (3.92 g, 60 mmol) and 4-aminobenzophenone (3.92 g, 60 mmol) under N<sub>2</sub> atmosphere at 0°C. Then the mixture was heated to reflux for 5 h. The solution was cooled to room temperature and quenched by addition of aqueous K<sub>2</sub>CO<sub>3</sub>. The mixture was washed by dichloromethane for three times. After solvent evaporation, the residue was purified on a silica-gel column using CH<sub>2</sub>Cl<sub>2</sub>: MeOH 75:1 as solvent to yield pure compound 2. <sup>1</sup>H NMR (DMSO-*d*<sub>6</sub>): 7.12 (t, 4H), 7.06 (t, 2H), 6.98 (d, 4H), 6.54 (d, 4H), 6.26 (d, 4H), 4.97 (s, 4H). <sup>13</sup>C NMR (DMSO-*d*<sub>6</sub>): 147.24, 145.36, 139.06, 132.12, 131.67, 131.38, 128.00, 126.20, 113.63.

## Synthesis of compound 3

Compound 1 (156.1 mg, 0.5 mmol), compound 2 (181.2 mg, 0.5 mmol), HATU (228.1 mg, 0.6 mmol) and DIPEA (87 μL, 0.5 mmol) was dissolved in CHCl<sub>3</sub> (5 mL) and stirred at room temperature for 30 min. The mixture was purified on a silica-gel column using CH<sub>2</sub>Cl<sub>2</sub>: ethyl acetate 10:1 as solvent to yield pure compound 3. <sup>1</sup>H NMR (DMSO-*d*<sub>6</sub>): 10.29 (s, 1H), 7.95 (d, 2H), 7.59 (t, 1H), 7.48 (d, 2H), 7.26 (s, 4H), 7.19-7.09 (m, 6H), 7.01 (d, 4H), 6.89 (d, 2H), 6.59 (d, 2H), 6.29 (d, 2H), 5.06 (s, 2H). <sup>13</sup>C NMR (DMSO-*d*<sub>6</sub>): 170.04, 164.03, 147.73, 144.71, 144.58, 141.47, 140.19, 137.91, 137.09, 136.68, 135.35, 132.64, 132.12, 131.63, 131.41, 131.29, 130.87, 128.26, 128.16, 126.74, 126.53, 125.66, 120.14, 113.59.

## Synthesis of compound 4

6-carboxyl tetramethylrhodamine (430.4 mg, 1.0 mmol) was dissolved in CH<sub>3</sub>CN (50 mL), then triethylamine (208  $\mu$ L, 1.5 mmol), HATU (456.3 mg, 1.2 mmol), and TTDDA-BOC (320.4 mg, 1.0 mmol) were added. The mixture was stirred at room temperature for 2 h. After solvent evaporation, the residue was purified on a silica-gel column using CH<sub>2</sub>Cl<sub>2</sub> : MeOH = 5 : 1 as solvent to yield pure compound 4. <sup>1</sup>H NMR (DMSO-*d*<sub>6</sub>): 13.36 (s, 1H), 8.72 (t, 1H), 8.22 (t, 1H), 7.82 (s, 1H), 6.97-6.73 (m, 6H), 3.49-3.30 (m, 16H), 3.19 (s, 12H), 2.94 (d, 2H), 1.74 (t, 2H), 1.57 (t, 2H), 1.36 (s, 9H). <sup>13</sup>C NMR (DMSO-*d*<sub>6</sub>): 168.73, 164.94, 152.63, 152.43, 141.08, 129.63, 128.97, 125.14, 122.69, 109.55, 106.13, 98.44, 77.84, 70.19, 69.97, 68.65, 68.53, 46.03, 37.68, 37.38, 30.16, 29.59, 28.72, 9.30.

## Synthesis of compound 5

2.2 mL TFA was added to an anhydrous CH<sub>2</sub>Cl<sub>2</sub> (10 mL) solution of compound 4 (147.0 mg, 0.2 mmol). Then the mixture was stirred at room temperature for 5 h. After solvent evaporation, triethylamine (139  $\mu$ L, 1.0 mmol), succinic anhydride (100.0 mg, 1.0 mmol) and MeCN (20 mL) were added. The mixture was stirred at room temperature for 12 h. After solvent evaporation, the residue was purified on a silica-gel column using CH<sub>2</sub>Cl<sub>2</sub> : MeOH = 20 : 3 (0.1% TFA) as solvent to yield pure compound 5.

## Synthesis of TPE-TMR

Compound 5 (73.5 mg, 0.10 mmol) was dissolved in CH<sub>3</sub>CN (10 mL), then triethylamine (21  $\mu$ L, 0.15 mmol), HATU (45.6 mg, 0.12 mmol) and compound 3 (65.7

mg, 0.10 mmol) were added. The mixture was stirred at room temperature for 2 h. After solvent evaporation, the residue was purified on a silica-gel column using  $\text{CH}_2\text{Cl}_2$  : MeOH = 10 : 1 as solvent to yield TPE-TMR.  $^1\text{H}$  NMR ( $\text{DMSO}-d_6$ ): 10.66 (s, 1H), 10.34-10.29 (m, 1H), 9.90-9.85 (m, 1H), 7.95 (d, 3H), 7.60 (d, 1H), 7.56-7.42 (m, 4H), 7.25 (s, 4H), 7.22-7.06 (m, 10H), 7.05-6.94 (m, 10H), 6.80 (d, 2H), 3.52-3.37 (m, 6H), 3.33 (s, 12H), 3.29-3.20 (m, 2H), 2.97-2.77 (m, 16H).

### Synthesis of DAN-NH<sub>2</sub>

Dansulfoyl chloride (487.4 mg, 1.8 mmol) was dissolved in 20 mL  $\text{CH}_2\text{Cl}_2$ , and ethylenediamine (6 mL, 90 mmol) was dissolved in 50 mL  $\text{CH}_2\text{Cl}_2$ . The above solutions were mixed in 0°C and stirred at room temperature for 1 h. Then, 150 mL of 1 M HCl was added for extraction, the aqueous phase was collected and neutralized by 5 M NaOH, and 100 mL of dichloromethane was added for extraction to collect the organic phase to afford DAN-NH<sub>2</sub>.  $^1\text{H}$  NMR ( $\text{CDCl}_3$ ): 8.56 (d, 1H), 8.33 (d, 1H), 8.28 (d, 1H), 7.57 (ddd, 2H), 7.21 (d, 1H), 2.94-2.91 (m, 8H), 2.72 (t, 2H), 1.26 (t, 1H).

### Synthesis of reference probe

Compound 1 (218.6 mg, 0.7 mmol) was dispersed in 20 mL acetonitrile, then HATU (380.2 mg, 1.0 mmol) and DIPEA (174  $\mu\text{L}$ ) were added. After dissolving, DAN-NH<sub>2</sub> (205.4 mg, 0.7 mmol) was added. The mixture was stirred at room temperature for 1 h. After solvent evaporation, the residue was purified on a silica-gel column using EA : PE = 5 : 1 as solvent to yield pure reference probe.  $^1\text{H}$  NMR ( $\text{DMSO}-d_6$ ): 8.57 (t, 1H), 8.45 (d, 1H), 8.28 (d, 1H), 8.12-8.07 (m, 2H), 7.81 (d, 2H), 7.63-7.53 (m, 3H), 7.24-

7.22 (m, 5H), 3.29 (q, 2H), 2.96 (q, 2H), 2.82 (s, 6H).

## Synthesis of PAO

*P*-arsanilic acid (10.85 g, 50 mmol) was dissolved in anhydrous methanol (60 mL), and the solution was heated to reflux. Thereafter, phenylhydrazine (10.3 mL, 100 mmol) was added dropwisely in 10 min. The mixture was stirred for 1 h. After solvent evaporation, 85 mL water (85°C) and 60 mL NaOH solution (0.1 M) were added, followed by washing with ether (150 mL). After removing the ether phase, 40 mL of NH<sub>4</sub>Cl solution (5 M) was added and the mixture was kept at 0°C for 1 h to produce white precipitate of PAO. The precipitate was filtered through a Buchner funnel, followed by washing with 50 mL of ice water to yield pure PAO.

## Synthesis of PAO-EDT

PAO (1.29 g, 6.42 mmol) was dissolved in 10 mL ethanol, and EDT (0.65 mL, 8.46 mmol) was added dropwisely under reflux. The reaction mixture was then stirred and refluxed for 30 min. The excess supernatant was removed after the reaction mixture was chilled in ethanol/ice. The PAO-EDT precipitate was recrystallized with 10 mL of ethanol, which was then filtered followed by washing with 10 mL of ice water to yield pure PAO-EDT. <sup>1</sup>H NMR (DMSO-*d*<sub>6</sub>): 7.27 (d, 2H), 6.56 (d, 2H), 5.41 (s, 2H), 3.35-3.30 (m, 2H), 3.26-3.21 (m, 2H).



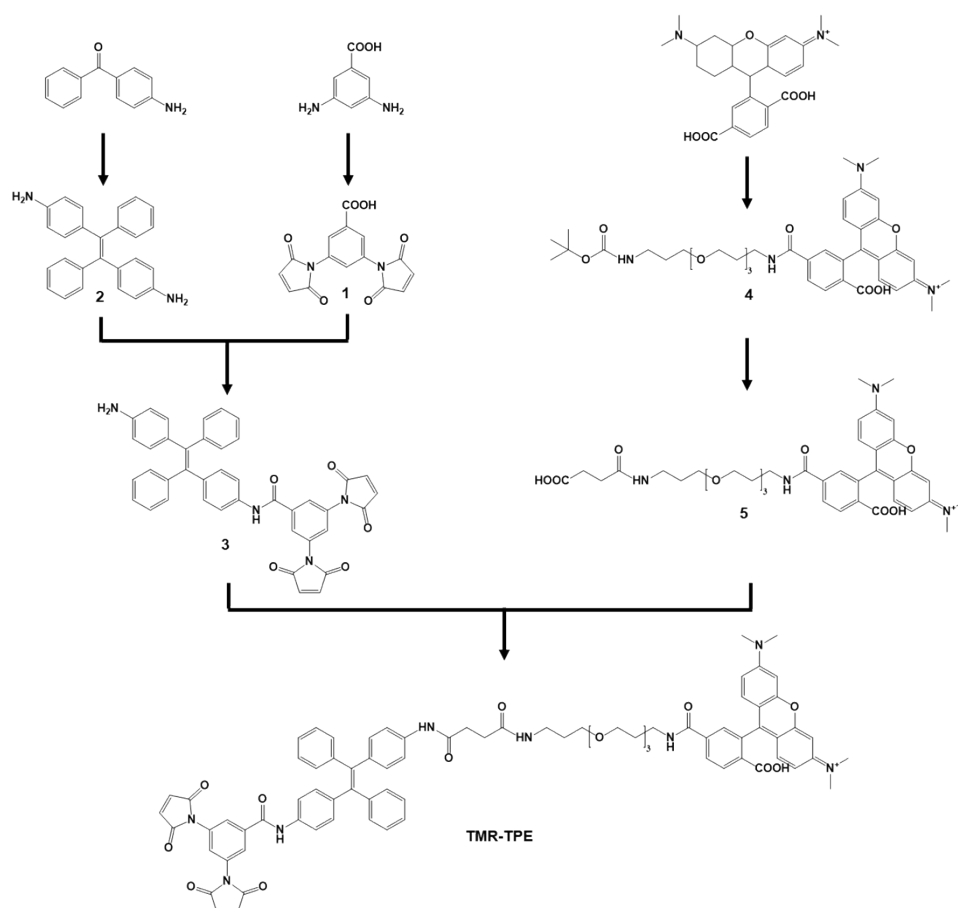

Scheme S1. Synthetic routes of TMR-TPE.

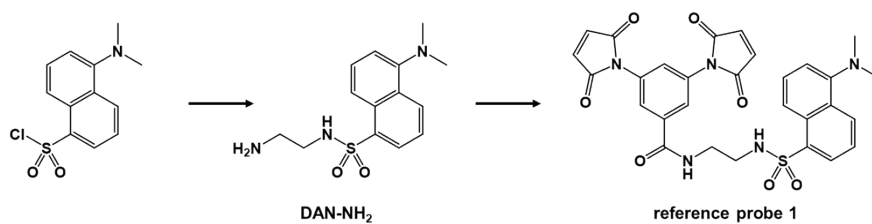

Scheme S2. Synthetic routes of reference probe 1.

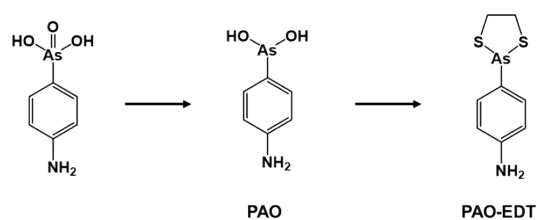

Scheme S3. Synthetic routes of PAO-EDT.

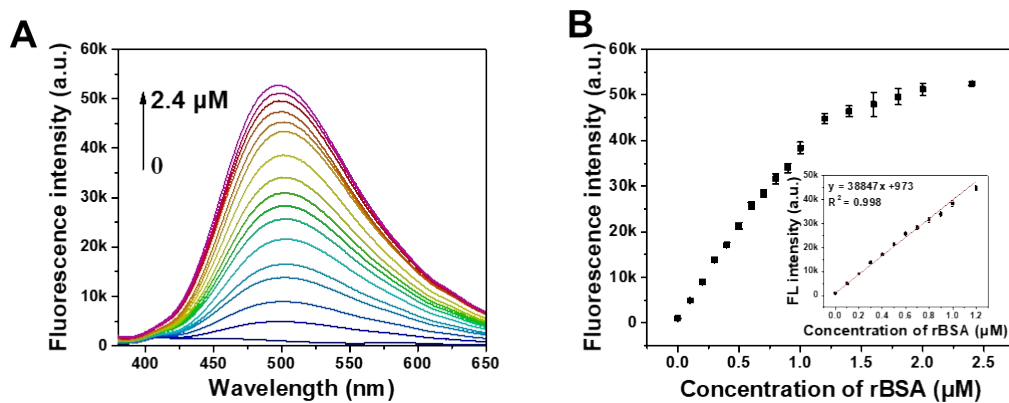

Fig. S1. (A) Variation of fluorescence spectra of Compound 3 (10  $\mu\text{M}$ ) at  $\lambda_{\text{ex}} = 360$  nm with increasing the concentration of rBSA (0-2.4  $\mu\text{M}$ ). (B) Fluorescence intensity at 502 nm in response to rBSA at various concentrations and linear relationship between fluorescence intensity at 502 nm and rBSA concentration (inset).

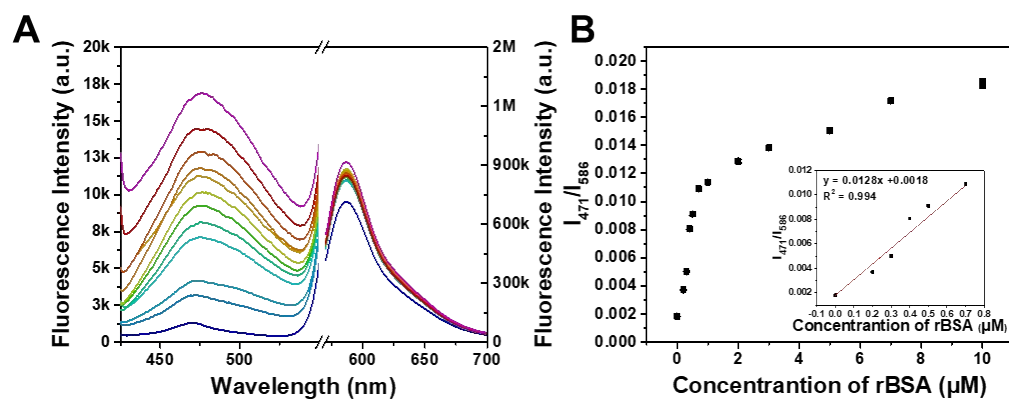

Fig. S2. (A) Variation of fluorescence spectra of TMR-TPE (10  $\mu\text{M}$ ) at  $\lambda_{\text{ex}} = 405$  nm and 559 nm with increasing the concentration of rBSA (0-10  $\mu\text{M}$ ). (B) Fluorescence intensity ratio ( $I_{471}/I_{586}$ ) of TMR-TPE in response to rBSA at various concentrations and linear relationship between  $I_{471}/I_{586}$  and rBSA concentration (inset).

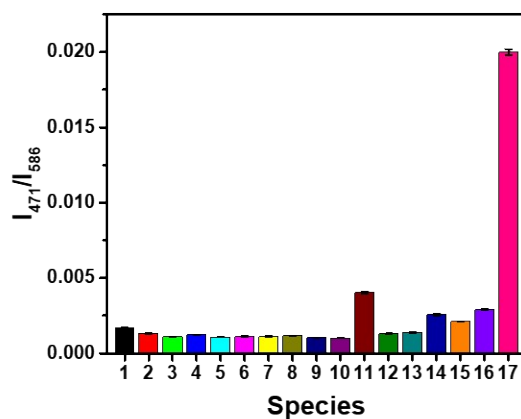

Fig. S3. Fluorescence intensity ratio ( $I_{471}/I_{586}$ ) of the TMR-TPE at  $\lambda_{\text{ex}} = 405$  and 559 nm upon the addition of various species (1. blank, 2. arginine, 3. threonine 4. histidine, 5. methionine, 6. cysteine, 7. homocysteine, 8. glutathione, 9. TCEP, 10. DTT, 11. lipase, 12. lactate dehydrogenase, 13. lysozyme, 14. ovalbumin, 15. BSA, 16. HSA, 17. rBSA. The concentration of small molecules is 1 mM, and proteins are 5  $\mu\text{M}$ .)

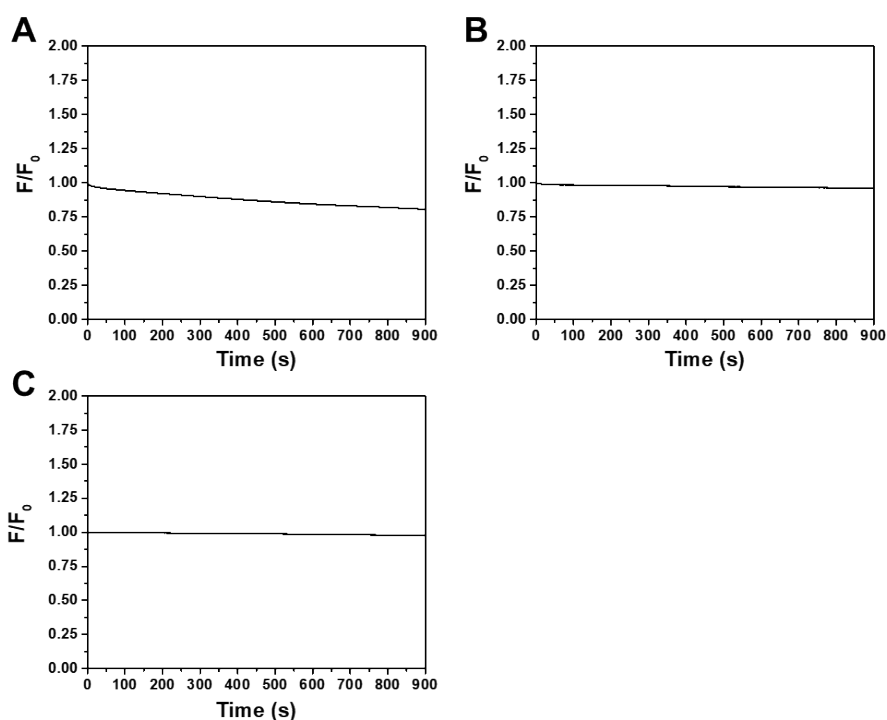

Fig. S4. Fluorescence intensity of TMR-TPE under continuous irradiation with a xenon lamp for 15 min at (A)  $\lambda_{\text{ex/em}}=360/471$  nm, (B)  $\lambda_{\text{ex/em}}=405/471$  nm and (C)  $\lambda_{\text{ex/em}}=559/586$  nm.

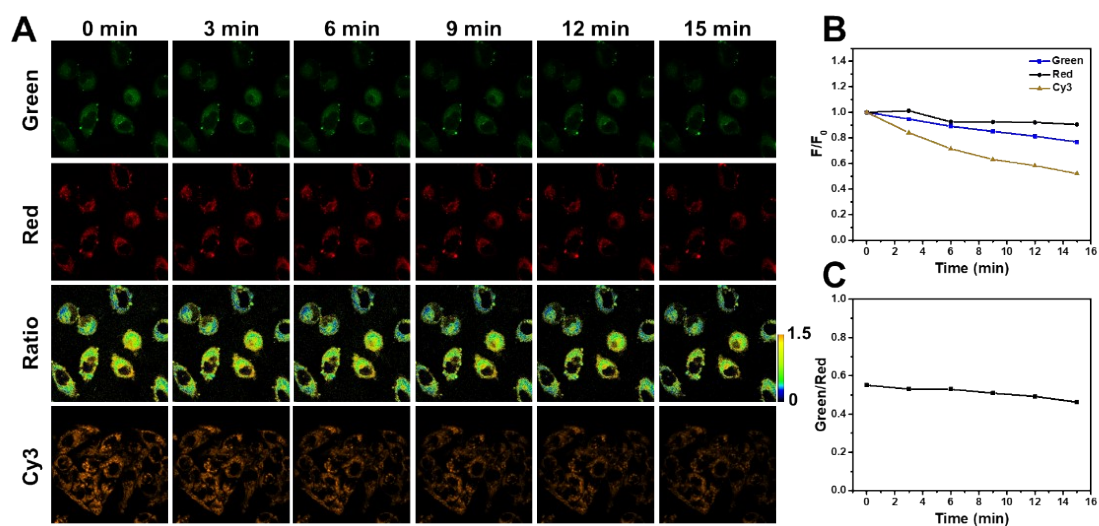

Fig. S5. (A) CLMS images of HepG2 cells stained by TMR-TPE or Cy3 under continuous irradiation with 405 and 559 nm laser of confocal microscopy for 15 min. Green channel:  $\lambda_{\text{ex}} = 405$  nm,  $\lambda_{\text{em}} = 460\text{-}500$  nm; red channel:  $\lambda_{\text{ex}} = 559$  nm,  $\lambda_{\text{em}} = 575\text{-}630$  nm; Cy3:  $\lambda_{\text{ex}} = 559$  nm,  $\lambda_{\text{em}} = 575\text{-}630$  nm. (B) Optical density at different time. (C)  $F_{\text{green}}/F_{\text{red}}$  ratios at different time.

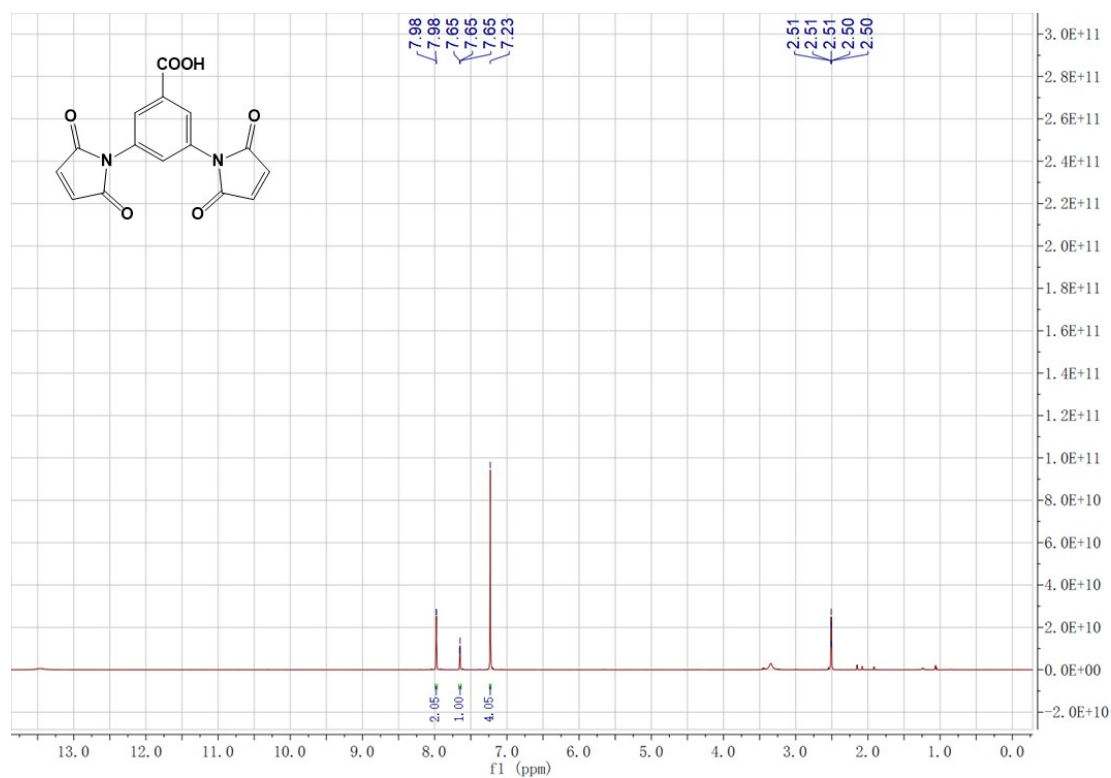

Fig. S6. <sup>1</sup>H NMR Spectrum of compound 1 in DMSO-*d*<sub>6</sub>.

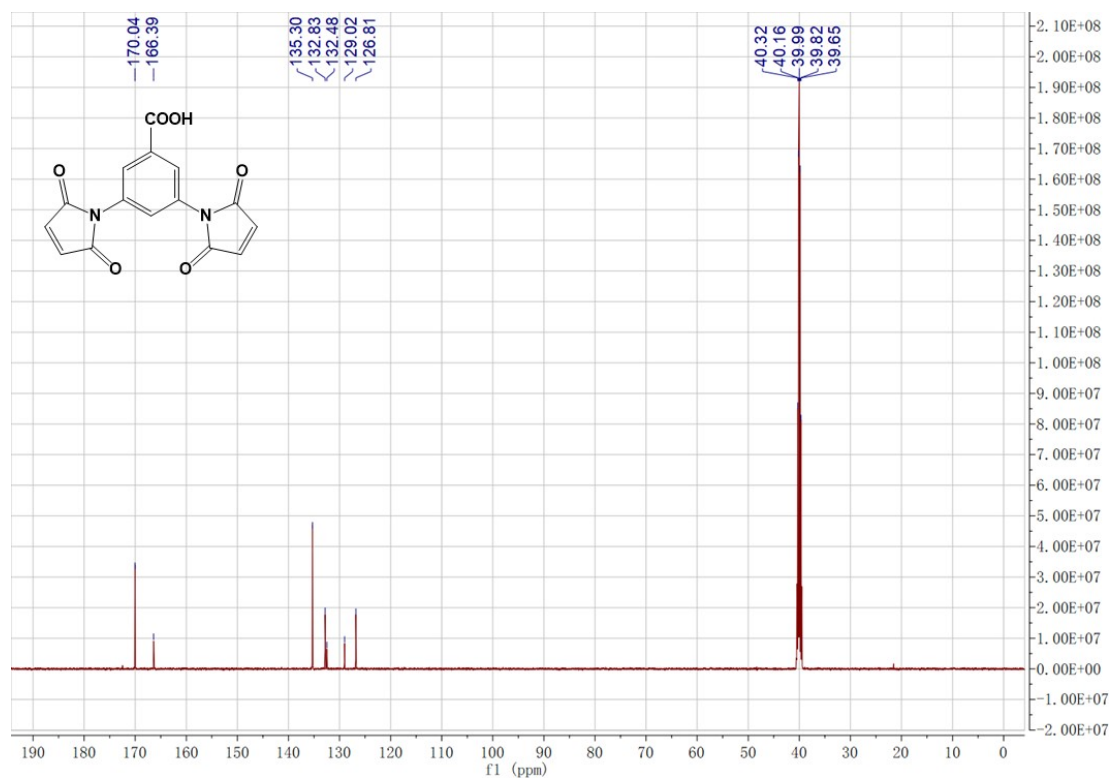

Fig. S7. <sup>13</sup>C NMR Spectrum of compound 1 in DMSO-*d*<sub>6</sub>.

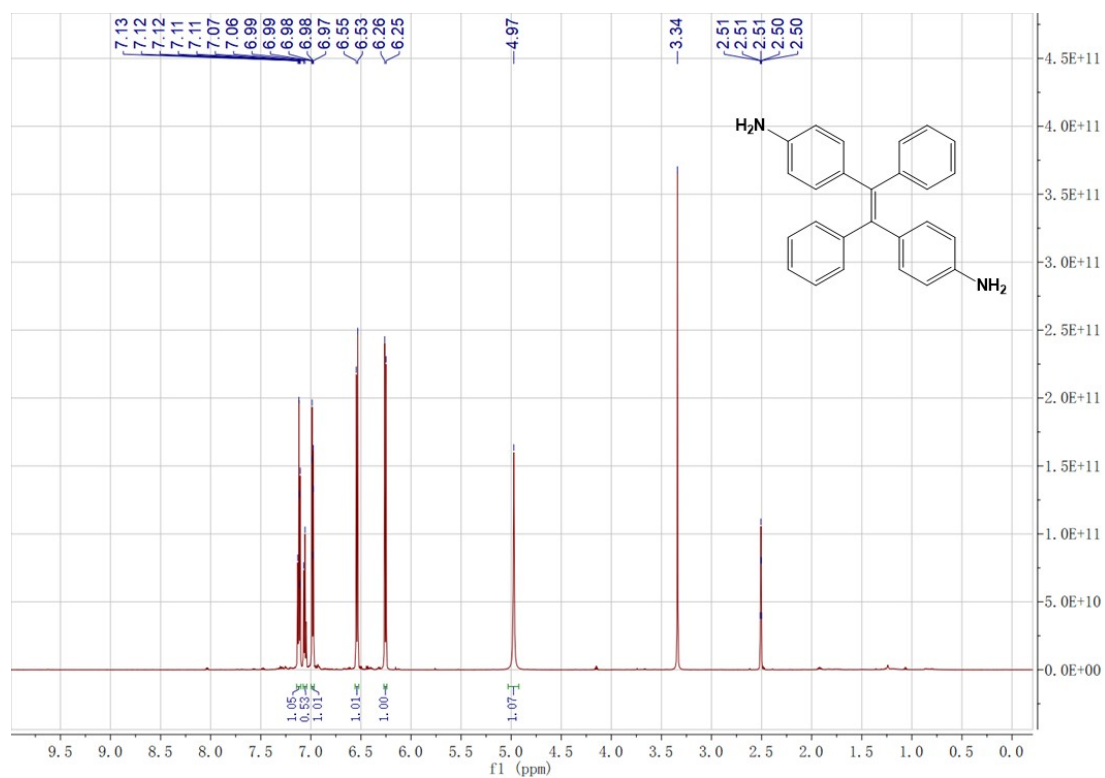

Fig. S8. <sup>1</sup>H NMR Spectrum of compound 2 in DMSO-*d*<sub>6</sub>.

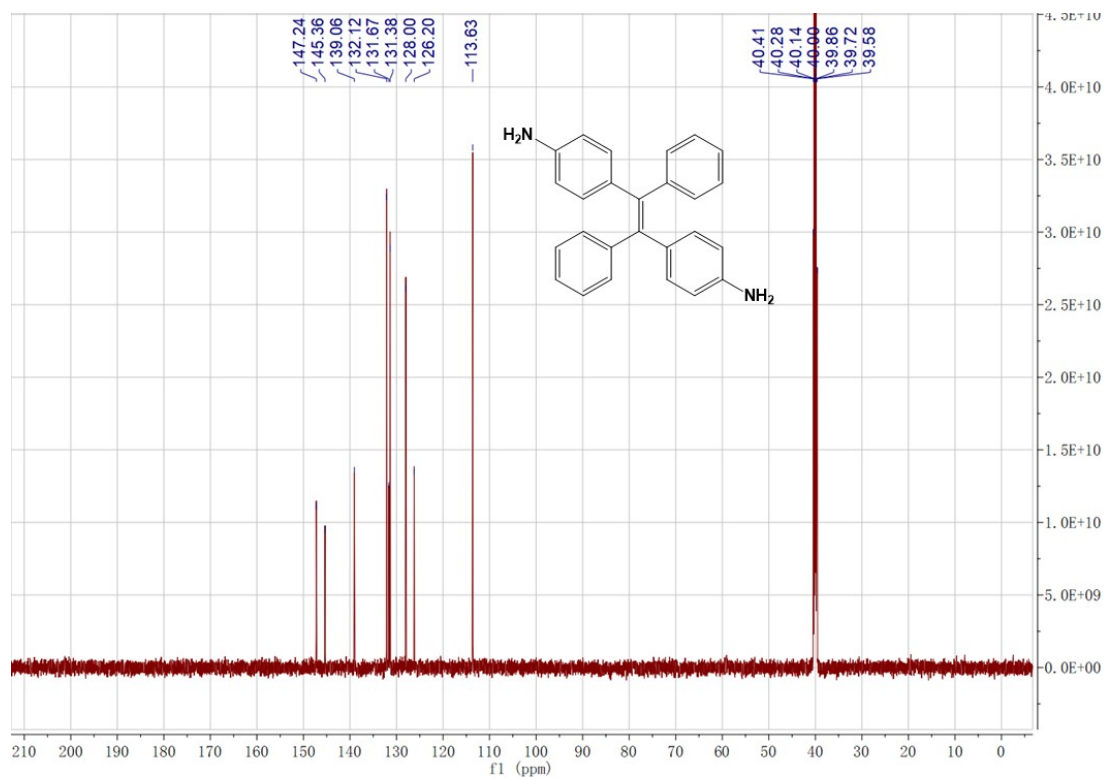

Fig. S9. <sup>13</sup>C NMR Spectrum of compound 2 in DMSO-*d*<sub>6</sub>.

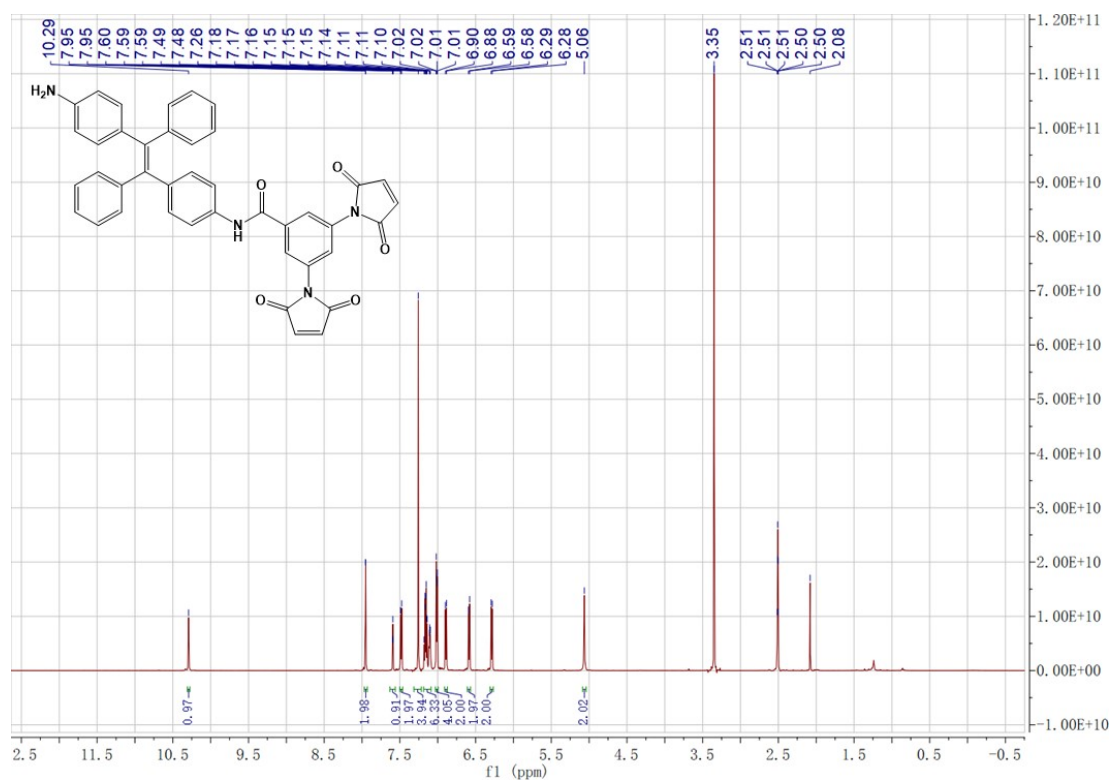

Fig. S10. <sup>1</sup>H NMR Spectrum of compound 3 in DMSO-*d*<sub>6</sub>.

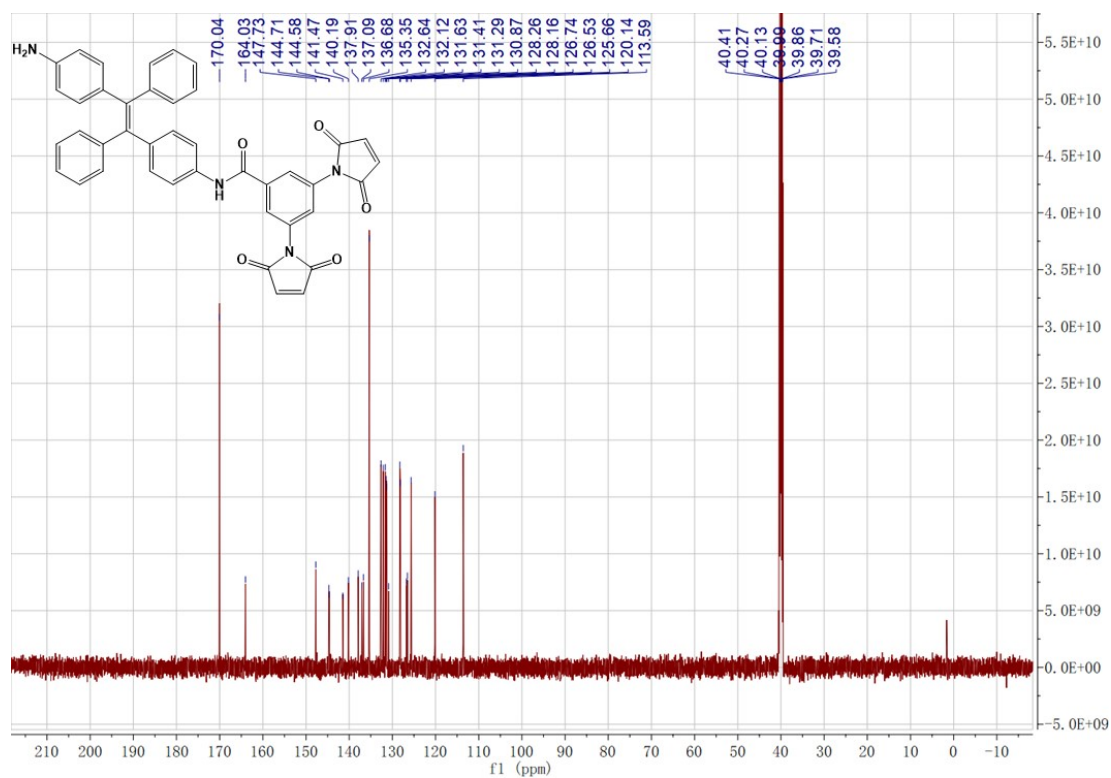

Fig. S11. <sup>13</sup>C NMR Spectrum of compound 3 in DMSO-*d*<sub>6</sub>.

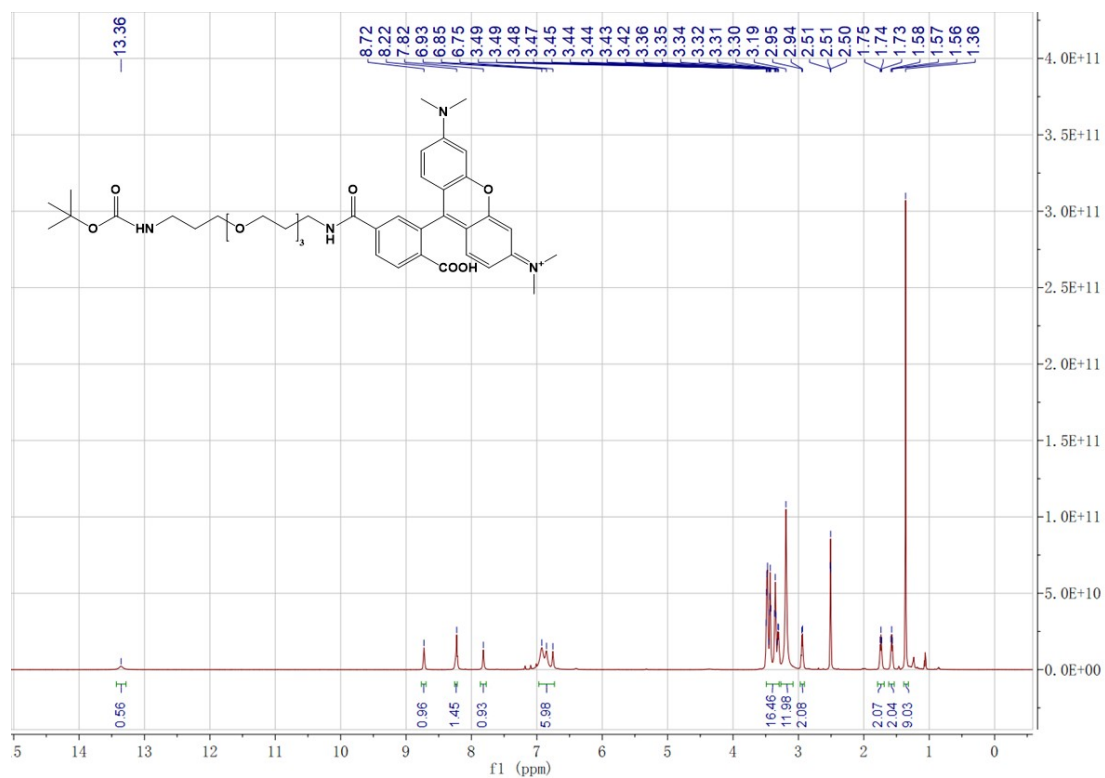

Fig. S12.  $^1\text{H}$  NMR Spectrum of compound 4 in  $\text{DMSO-}d_6$ .

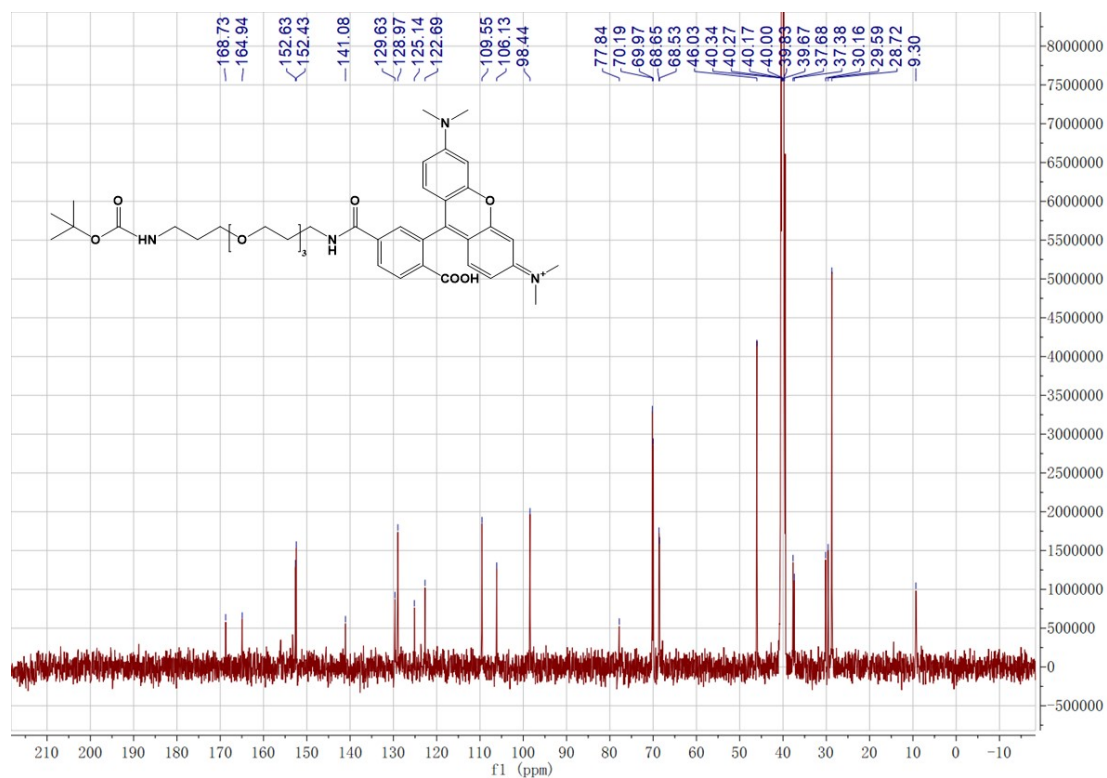

Fig. S13.  $^{13}\text{C}$  NMR Spectrum of compound 4 in  $\text{DMSO-}d_6$ .



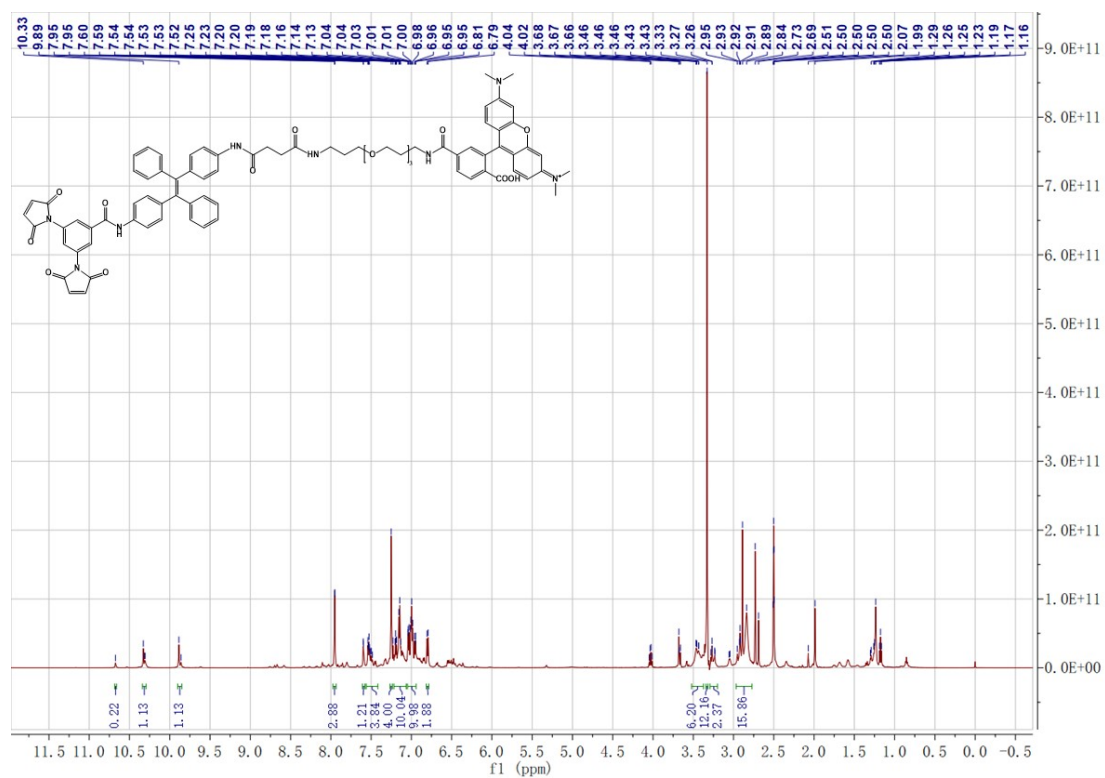

Fig. S14.  $^1\text{H}$  NMR Spectrum of TMR-TPE in  $\text{DMSO-}d_6$ .

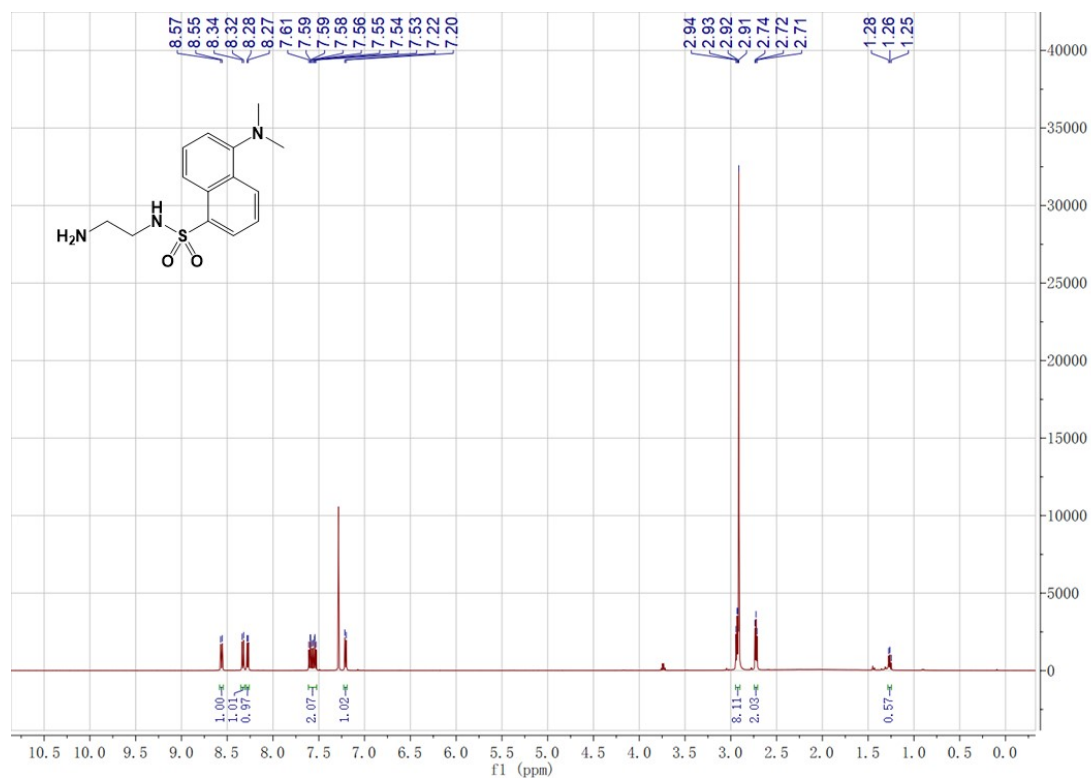

Fig. S15.  $^1\text{H}$  NMR Spectrum of DAN- $\text{NH}_2$  in  $\text{CDCl}_3$ .
